# Supplementary material
Source: publisher figshare collection journal article supplement (https://karger.figshare.com/ndownloader/files/17357927)
Supplement: Supplementary file 1 [file 17357927]

Online supplementary material 1

Contents of therapeutic modules of SOMA-CBT and ENCERT

| Module/  Session | SOMA-CBT | ENCERT |
| --- | --- | --- |
| 1/  1 | Illness beliefs and therapeutic targets:  Exploration patient’s illness beliefs; developing therapeutic targets | Illness beliefs and therapeutic targets:  Exploration patient’s illness beliefs considering the role of negative emotions; developing therapeutic targets |
| 2/  2-6 | Distress and physical symptoms:  Psychoeducation: distress and physical symptoms; stress management and relaxation techniques | Negative emotions and physical symptoms:  Psychoeducation: negative emotions and physical symptoms; introduction to the concept of acceptance (versus change) and mindfulness |
| 3/  7-9 | Attention and physical symptoms:  Psychoeducation: relationship between attention and physical symptoms; focusing exercises to shift attention away from physical symptoms | Mindful symptom perception:  Psychoeducation: mindfulness; exercises to facilitate mindful perception of physical symptoms |
| 4/  10-14 | Dysfunctional cognitions and physical symptoms:  Psychoeducation: dysfunctional thoughts and physical symptoms; identifying individuals’ dysfunctional symptom-related thoughts; strategies of reappraisal and cognitive restructuring; behavioural experiments (symptom induction) for questioning dysfunctional symptom-related thoughts | Dysfunctional cognitions and physical symptoms:  Psychoeducation: negative thoughts and physical symptoms; identifying individuals’ dysfunctional symptom-related thoughts; strategies of reappraisal and cognitive restructuring; strategies of mindful perception of dysfunctional thoughts; supporting the patient in finding out individual helpful strategies (acceptance versus change) |
| 5/  15-18 | Illness behaviours and physical symptoms:  Psychoeducation: illness behaviours and physical symptom; exposure-based and cognitive strategies to reduce avoidance behaviours and doctor-shopping | Illness behaviours and physical symptoms:  Psychoeducation: illness behaviours and physical symptom; acceptance-based strategies and cognitive reappraisal to reduce avoidance behaviours and doctor-shopping; refocusing on life values and goals |
| 6/  19-20 | Explanatory model and relapse prevention:  1 session with open contents: specific problem of the patient or repeating contents from previous modules; summary of therapy contents in an individual explanatory model of MUS; relapse prevention | Explanatory model and relapse prevention:  1 session with open contents: specific problem of the patient or repeating contents from previous modules; summary of therapy contents in an individual explanatory model of MUS considering the role of negative emotions; relapse prevention |

Online supplementary material 2

14-item scale to assess therapist adherence and treatment specificity

**Unique items for ENCERT**

1. The concept of acceptance was explained with worksheet 5.3 „What does acceptance mean?” (therapy session 5)

0 = Not adherent: Neither worksheet 5.3 was discussed nor the concept of acceptance was explained

1 = Partly adherent: Worksheet 5.3 was neither used nor discussed but the concept of acceptance was explained

2 = Adherent: The concept of acceptance was explained with worksheet 5.3.

1. The difference between „fighting“ and „releasing“ was explained with Instruction 5.2 “Stop the tug-of-war with your problem”. (therapy session 5)

0 = Not adherent: Neither the tug-of-war exercise (Instruction 5.2) was conducted nor the difference between “fighting” and “releasing” was explained. Or the difference between “fighting” and „releasing“ was explained but without conducting the tug-of-war-exercise.

1 = Partly adherent: The tug-of-war exercise was performed, but not completely, and at least one of the following issues was missing: tug-of-war with patients in order to illustrate the fight with the problem, discussing the alternative of releasing the rope and its consequences and the possibility of controlling own behaviour.

2 = Adherent: The tug-of-war exercise was conducted and differences between “fighting” and “releasing” were explained. The following issues were completely explained and considered: tug-of-war with patients in order to illustrate consequences of fighting with the problem, discussing the alternative of releasing the rope and its consequences, discussing the possibility of controlling own behaviour.

1. Patient’s previous attempts to cope with situations which have distressed him/her are elaborated with worksheet 5.1 „My previous coping attempts”. (therapy session 5)

0 = Not adherent: Neither worksheet 5.1 was discussed nor previous coping attempts were elaborated (without the worksheet).

1 = Partly adherent: Worksheet 5.1 was not used. However previous coping attempts were discussed without using the worksheet.

2 = Adherent: Previous coping attempts in situations which appeared to be particularly distressing for the patient were discussed with worksheet 5.1.

1. The concept of creative hopelessness was explained with the Chinese finger trap-exercise (Instruction 5.1). (therapy session 5)

0 = Not adherent: Neither the Chinese finger trap-exercise was performed nor the concept of creative hopelessness was discussed./ Only the concept of creative hopelessness was discussed however the Chinese finger trap exercise was not performed.

1 = Partly adherent: The Chinese finger trap exercise was performed, but not completely, and at least one of the following issues was missing: patient and therapist discussed the pose of the fingers in the trap, discussing options of alternative behaviours (e.g., pushing both fingers in the trap), transferring the message of the Chinese finger trap-exercise on the patient’s problem.

2 = Adherent: The concept of creative hopelessness was explained with the Chinese finger trap-exercise (Instruction 5.1)

1. The patient’s insight and knowledge about the concept of acceptance is transferred to the patient’s individual problems with worksheet 5.2 “When can I change something and when not?” (therapy session 5)

0 = Not adherent: Neither worksheet 5.2 was discussed nor patient’s knowledge about the concept of acceptance was transferred to the patient’s problems.

1 = Partly adherent: Worksheet 5.2 was not used. However patient’s knowledge about the concept of acceptance was transferred to the patient’s individual problems.

2 = Adherent: The patient’s insights and knowledge about the concept of acceptance were transferred to the patient’s individual problems with worksheet 5.2.

1. Being mindful with thoughts and emotions was practiced with the exercise “leaves on the stream” (Instruction 13.2). (therapy session 13)

0 = Not adherent: Neither the exercise “leaves on the stream” was conducted nor the role of mindfulness was discussed./ The role of mindfulness was discussed without conducting the “leaves on the stream” exercise.

1 = Partly adherent: Another imagination (instead of “leaves on the stream”) was used in order to explain the concept of mindfulness (e.g. clouds, trains, assembly line etc.)./ The „leaves on the stream“ exercise was performed, but not completely, and at least one of the following issues was missing: short relaxation instruction before the imagery was induced; mindful perception of thoughts, emotions, physical sensations or memories; brief example of thoughts; patient practiced for him or herself 2-3 minutes at the end of the exercise

2 = Adherent: Being mindful with thoughts and emotions was practiced with the exercise “leaves on the stream” (Instruction 13.2).

1. Therapist and patients discussed which thoughts can be questioned and for which thoughts acceptance-based strategies are helpful. (therapy session 13)

0 = Not adherent: The therapist did not discuss with the patient which thoughts can be questioned and for which thoughts acceptance-based strategies are helpful.

1 = Partly adherent: The therapist discussed with the patient which thoughts can be questioned but not for which thoughts acceptance-based strategies are helpful./ The therapist discussed for which thoughts acceptance-based strategies are help but not which thoughts can be questioned.

2 = Adherent: Therapist and patient discussed which thoughts can be questioned and for which thoughts acceptance-based strategies are helpful.

**Unique items for SOMA-CBT**

1. Patient’s less helpful attitudes and distressing thoughts were questioned with worksheet 5.2 „Consequences of my stressful thoughts“ and a cost-benefit analysis was conducted. (therapy session 5)

0 = Not adherent: Neither worksheet 5.2 was discussed nor patient’s less helpful attitudes and distressing thoughts were questioned under consideration of a cost-benefit analysis.

1 = Partly adherent: Worksheet 5.2 was not discussed. However patient’s less helpful attitudes and distressing thoughts were questioned.

2 = Adherent: Patient’s less helpful attitudes and distressing thoughts were questioned with worksheet 5.2 „Consequences of my stressful thoughts“ and a cost-benefit analysis was conducted.

1. Therapist and patient developed helpful self-instructions with worksheet 5.3 „My positive self-instructions“ which shall help the patient to deal with his or her distressing thoughts. (therapy session 5)

0 = Not adherent: Neither worksheet 5.3 was discussed nor helpful self-instructions were developed in order to help the patient dealing with his or her distressing thoughts.

1 = Partly adherent: Worksheet 5.3 was not applied however helpful self-instructions were developed in order to help the patient dealing with his or her distressing thoughts.

2 = Adherent: Therapist and patient developed helpful self-instructions with worksheet 5.3 „My positive self-instructions“ which shall help the patient to deal with his or her distressing thoughts.

1. Therapist and patient discussed patient’s less helpful attitudes and stress-amplifying thoughts with worksheet 5.1 (therapy session 5)

0 = Not adherent: Neither worksheet 5.1 was discussed nor patient’s less helpful attitudes and stress-amplifying thoughts were discussed (without using the worksheet).

1 = Partly adherent: Worksheet 5.1 was not discussed. However patient’s less helpful attitudes and stress-amplifying thoughts were discussed (without using the worksheet).

2 = Adherent: Therapist and patient discussed patient’s less helpful attitudes and stress-amplifying thoughts with worksheet 5.1

1. Therapist and patient identified different types of negative thoughts about physical symptoms with worksheet 13.2 „Types of negative thoughts“. (therapy session 13)

0 = Not adherent: Neither worksheet 13.2 was discussed nor different types of negative thoughts about physical symptoms were identified.

1 = Partly adherent: Worksheet 13.2 was used. However different types of negative thoughts about physical symptoms were identified.

2 = Adherent: Therapist and patient identified different types of negative thoughts about physical symptoms with worksheet 13.2 „Types of negative thoughts“.

1. The hyperventilation exercise (Instruction 13.1) was conducted in order to demonstrate to the patient that physical symptoms can be evoked by other factors than medical causes. (therapy session 13)

0 = Not adherent: Neither the hyperventilation exercise was conducted nor was discussed that physical symptoms can be evoked on their own./ Therapist and patients discussed that physical symptoms can be evoked by other factors than medical causes. However the hyperventilation exercise was not performed

1 = Partly adherent: The hyperventilation exercise was conducted but was completed in less than 1 minute. / The therapist did not hyperventilate him-/herself together with the patient but used a different instruction (e.g., the patient determines frequency or the therapist only says “in” and “out”)./ The exercise was performed properly however patient and therapist did not discuss patient’s experiences with the exercise.

2 = Adherent: The hyperventilation exercise (Instruction 13.1) was conducted (at least 1 minute) in order to demonstrate to the patient that physical symptoms can be evoked by other factors than medical causes.

1. Therapist and patient planed with worksheet 13.1 „Behavioral experiments“ behavioural experiments in order to provoke physical misperceptions. (therapy session 13)

0 = Not adherent: Neither worksheet 13.1 was completed nor other possibilities of provoking physical misperceptions were discussed

1 = Partly adherent: Worksheet 13.1 was not used. However other possibilities of provoking physical misperceptions were discussed

2 = Adherent: Therapist and patient planed with worksheet 13.1 behavioural experiments in order to provoke physical misperceptions.

1. The therapist used the imagery „sirens“ to explain to the patient that physical perceptions can be interpreted in different ways. (therapy session 13)

0 =Not adherent: Neither the imagery “sirens“ was used nor the therapist explained to the patient that physical perceptions can be interpreted in different ways (without the siren metaphor).

1 = Partly adherent: The imagery “sirens” was not used but the therapist discussed with the patient that physical perceptions can be interpreted in different ways (without the siren metaphor)

2 = Adherent: The therapist used the imagery „sirens“ to explain to the patient that physical perceptions can be interpreted in different ways.

Online supplementary material 3

Results of sensitivity analysis 1: Estimated group difference for primary and secondary outcomes at the end of therapy and 6 months after the end of therapy (minimal therapy dosage sample: randomised patients who received at least five therapy sessions; ntotal=202, nSOMA-CBT=99, nENCERT=103)

|  | SOMA-CBT | ENCERT | ENCERT versus SOMA-CBT |
| --- | --- | --- | --- |
|  | Estimated change  [95% confidence interval]c | Estimated change  [95% confidence interval]c | CLIb  [95% confidence interval]c |
| Symptom severity (SOMS-7T) |  |  |  |
| End of therapy | 0.31 [0.23 to +∞] | 0.39 [0.29 to +∞] | 0.09 [-0.01 to +∞] |
| 6-month follow-up | 0.34 [0.27 to +∞] | 0.36 [0.26 to +∞] | 0.01 [-0.11 to +∞] |
| Number of symptoms (MUS interview)a |  |  |  |
| End of therapy | 5.28 [4.09 to +∞] | 5.10 [3.46 to +∞] | -0.18 [-1.81 to +∞] |
| 6-month follow-up | 5.70 [4.43 to +∞] | 5.34 [3.62 to +∞] | -0.36 [-2.08 to +∞] |
| Symptom disability (MUS interview)a |  |  |  |
| End of therapy | 26.57 [22.27 to +∞] | 24.94 [19.18 to +∞] | -1.63 [-7.38 to +∞] |
| 6-month follow-up | 20.53 [16.16 to +∞] | 24.40 [18.62 to +∞] | 3.87 [-1.89 to +∞] |
| Psychological SSD criteria (MUS interview)a |  |  |  |
| End of therapy | 4.97 [4.13 to +∞] | 6.10 [4.96 to +∞] | 1.13 [-0.00 to +∞] |
| 6-month follow-up | 5.52 [4.67 to +∞] | 6.30 [5.19 to +∞] | 0.79 [-0.32 to +∞] |
| Symptom disability (mPDI) |  |  |  |
| End of therapy | 12.24 [9.62 to +∞] | 13.94 [10.60 to +∞] | 1.70 [-1.63 to +∞] |
| 6-month follow-up | 13.06 [10.60 to +∞] | 13.95 [10.55 to +∞] | 0.89 [-2.49 to +∞] |
| Symptom severity (PHQ-15) |  |  |  |
| End of therapy | 4.91 [4.07 to +∞] | 5.84 [4.72 to +∞] | 0.93 [-0.19 to +∞] |
| 6-month follow-up | 5.17 [4.43 to +∞] | 5.20 [4.06 to +∞] | 0.02 [-1.11 to +∞] |
| Health-related quality of life (EQ-5D) |  |  |  |
| End of therapy | 1.28 [1.00 to +∞] | 1.38 [1.02 to +∞] | 0.10 [-0.26 to +∞] |
| 6-month follow-up | 1.25 [0.96 to +∞] | 1.24 [0.83 to +∞] | -0.01 [-0.42 to +∞] |
| Health anxiety (mSHAI) |  |  |  |
| End of therapy | 9.90 [7.90 to +∞] | 12.41 [9.76 to +∞] | 2.51 [-0.14 to +∞] |
| 6-month follow-up | 9.57 [7.03 to +∞] | 11.78 [8.72 to +∞] | 2.21 [-0.84 to +∞] |
| Cognitive symptom coping (mCPQ) |  |  |  |
| End of therapy | 11.52 [9.40 to +∞] | 13.65 [10.56 to +∞] | 2.14 [-0.94 to +∞] |
| 6-month follow-up | 12.15 [10.03 to +∞] | 15.08 [12.01 to +∞] | 2.93 [-0.14 to +∞] |
| Behavioural symptom coping (mCPQ) |  |  |  |
| End of therapy | 8.78 [6.95 to +∞] | 9.25 [6.81 to +∞] | 0.47 [-1.97 to +∞] |
| 6-month follow-up | 7.71 [5.29 to +∞] | 9.81 [7.29 to +∞] | 2.09 [-0.41 to +∞] |
| Symptom distress (mCPQ) |  |  |  |
| End of therapy | 15.04 [12.34 to +∞] | 19.76 [16.19 to +∞] | **4.73 [1.17 to +∞]** |
| 6-month follow-up | 16.19 [13.35 to +∞] | 17.32 [13.40 to +∞] | 1.13 [-2.78 to +∞] |
| Depression (BDI) |  |  |  |
| End of therapy | 9.28 [7.78 to +∞] | 10.82 [8.81 to +∞] | 1.54 [-0.47 to +∞] |
| 6-month follow-up | 8.02 [6.21 to +∞] | 9.22 [6.79 to +∞] | 1.20 [-1.21 to +∞] |
| General psychopathology (SCL-90-R GSI) |  |  |  |
| End of therapy | 0.34 [0.27 to +∞] | 0.47 [0.38 to +∞] | **0.13 [0.03 to +∞]** |
| 6-month follow-up | 0.36 [0.28 to +∞] | 0.42 [0.31 to +∞] | 0.06 [-0.05 to +∞] |
| Number of GP visits (past 12 months) |  |  |  |
| End of therapy | --- | --- | --- |
| 6-month follow-up | -3.52 [-7.87 to +∞] | -3.69 [-8.11 to +∞] | -0.17 [-4.58 to +∞] |
| Emotion regulation skills (ERSQ total score) |  |  |  |
| End of therapy | 0.48 [0.35 to +∞] | 0.66 [0.48 to +∞] | **0.18 [0.001 to +∞]** |
| 6-month follow-up | 0.49 [0.36 to +∞] | 0.71 [0.51 to +∞] | **0.21 [0.02 to +∞]** |
| Awareness (ERSQ) |  |  |  |
| End of therapy | 0.20 [0.05 to +∞] | 0.26 [0.03 to +∞] | 0.05 [-0.17 to +∞] |
| 6-month follow-up | 0.14 [-0.03 to +∞] | 0.22 [-0.03 to +∞] | 0.07 [-0.17 to +∞] |
| Sensations (ERSQ) |  |  |  |
| End of therapy | 0.63 [0.44 to +∞] | 0.64 [0.39 to +∞] | 0.02 [-0.23 to +∞] |
| 6-month follow-up | 0.66 [0.49 to +∞] | 0.64 [0.38 to +∞] | -0.02 [-0.28 to +∞] |
| Clarity (ERSQ) |  |  |  |
| End of therapy | 0.23 [0.06 to +∞] | 0.43 [0.18 to +∞] | 0.20 [-0.05 to +∞] |
| 6-month follow-up | 0.35 [0.15 to +∞] | 0.57 [0.29 to +∞] | 0.22 [-0.06 to +∞] |
| Understanding (ERSQ) |  |  |  |
| End of therapy | 0.45 [0.30 to +∞] | 0.70 [0.47 to +∞] | **0.25 [0.02 to +∞]** |
| 6-month follow-up | 0.62 [0.44 to +∞] | 0.88 [0.62 to +∞] | **0.26 [0.01 to +∞]** |
| Acceptance (ERSQ) |  |  |  |
| End of therapy | 0.52 [0.35 to +∞] | 0.86 [0.61 to +∞] | **0.34 [0.09 to +∞]** |
| 6-month follow-up | 0.56 [0.38 to +∞] | 0.90 [0.64 to +∞] | **0.35 [0.08 to +∞]** |
| Resilience (ERSQ) |  |  |  |
| End of therapy | 0.62 [0.44 to +∞] | 0.94 [0.68 to +∞] | **0.32 [0.06 to +∞]** |
| 6-month follow-up | 0.72 [0.53 to +∞] | 1.03 [0.76 to +∞] | **0.31 [0.03 to +∞]** |
| Readiness to confront (ERSQ) |  |  |  |
| End of therapy | 0.39 [0.24 to +∞] | 0.45 [0.22 to +∞] | 0.06 [-0.17 to +∞] |
| 6-month follow-up | 0.37 [0.19 to +∞] | 0.51 [0.27 to +∞] | 0.14 [-0.10 to +∞] |
| Compassionate self-support (ERSQ) |  |  |  |
| End of therapy | 0.52 [0.33 to +∞] | 0.69 [0.43 to +∞] | 0.18 [-0.08 to +∞] |
| 6-month follow-up | 0.44 [0.26 to +∞] | 0.75 [0.48 to +∞] | **0.30 [0.04 to +∞]** |
| Modification (ERSQ) |  |  |  |
| End of therapy | 0.75 [0.60 to +∞] | 0.94 [0.71 to +∞] | 0.19 [-0.04 to +∞] |
| 6-month follow-up | 0.61 [0.43 to +∞] | 0.87 [0.63 to +∞] | **0.26 [0.02 to +∞]** |

aclinician-rated outcomes

bPositive values indicate a result in favour for ENCERT.

c one-tailed confidence intervals

Figures in bold indicate statistically significant CLI (based on one-tailed p-value).

CLI=cross-level interaction.

MUS=medically unexplained symptoms, DSM-IV=Diagnostic and Statistical Manual of Mental Disorders, 4th revision, SOMS-7T= Screening of Somatoform Disorders-7T, MUS interview=Clinician-rated interview for patients with medically unexplained symptoms, SSD=Somatic Symptom Disorder, PHQ-15=Patient Health Questionnaire-15, mPDI= modified Pain Disability Index, EQ-5D=EuroQuol-5D, mSHAI= modified version of the Short Health Anxiety Inventory, mCPQ= modified Coping Pain Questionnaire, BDI=Beck Depression Inventory, GSI=Global Severity Index, SCL-90-R=Symptom Checklist-90-Revised, GP=general practitioner, ERSQ= Emotion Regulation Skills Questionnaire.

Online supplementary material 4

Results of sensitivity analysis 2: Estimated group difference for primary and secondary outcomes at the end of therapy and 6 months after the end of therapy (primary outcome completer sample: patients who completed the primary outcome at all assessment points; ntotal=159, nSOMA-CBT=81, nENCERT=78)

|  | SOMA-CBT | ENCERT | ENCERT versus SOMA-CBT |
| --- | --- | --- | --- |
|  | Estimated change  [95% confidence interval]c | Estimated change  [95% confidence interval]c | CLIb  [95% confidence interval]c |
| Symptom severity (SOMS-7T) |  |  |  |
| End of therapy | na | na | na |
| 6-month follow-up | na | na | na |
| Number of symptoms (MUS interview)a |  |  |  |
| End of therapy | 5.81 [4.46 to +∞] | 4.90 [3.00 to +∞] | -0.91 [-2.81 to +∞] |
| 6-month follow-up | 6.10 [4.66 to +∞] | 5.23 [3.21 to +∞] | -0.87 [-2.89 to +∞] |
| Symptom disability (MUS interview)a |  |  |  |
| End of therapy | na | na | na |
| 6-month follow-up | na | na | na |
| Psychological SSD criteria (MUS interview)a |  |  |  |
| End of therapy | 5.26 [4.27 to +∞] | 6.45 [5.09 to +∞] | 1.19 [-0.16 to +∞] |
| 6-month follow-up | 5.95 [4.99 to +∞| | 6.56 [5.25 to +∞] | 0.61 [-0.69 to +∞] |
| Symptom disability (mPDI) |  |  |  |
| End of therapy | 13.52 [10.66 to +∞] | 13.39 [9.60 to +∞] | -0.13 [-3.92 to +∞] |
| 6-month follow-up | 13.75 [11.03 to +∞] | 13.54 [9.81 to +∞] | -0.21 [-3.93 to +∞] |
| Symptom severity (PHQ-15) |  |  |  |
| End of therapy | 5.00 [4.15 to +∞] | 5.75 [4.55 to +∞] | 0.75 [-0.45 to +∞] |
| 6-month follow-up | 5.21 [4.48 to +∞] | 5.14 [3.95 to +∞] | -0.06 [-1.25 to +∞] |
| Health-related quality of life (EQ-5D) |  |  |  |
| End of therapy | 1.28 [1.00 to +∞] | 1.29 [0.91 to +∞] | 0.01 [-0.38 to +∞] |
| 6-month follow-up | 1.29 [1.01 to +∞] | 1.10 [0.68 to +∞] | -0.19 [-0.61 to +∞] |
| Health anxiety (mSHAI) |  |  |  |
| End of therapy | 9.94 [7.95 to +∞] | 12.77 [10.01 to +∞] | **2.83 [0.09 to +∞]** |
| 6-month follow-up | 9.06 [6.54 to +∞] | 12.04 [8.95 to +∞] | 2.95 [-0.10 to +∞] |
| Cognitive symptom coping (mCPQ) |  |  |  |
| End of therapy | 11.99 [9.71 to +∞] | 14.96 [11.48 to +∞] | 2.97 [-0.50 to +∞] |
| 6-month follow-up | 11.73 [9.46 to +∞] | 15.13 [11.77 to +∞] | **3.39 [0.04 to** +∞**]** |
| Behavioural symptom coping (mCPQ) |  |  |  |
| End of therapy | 9.01 [7.00 to +∞] | 10.22 [7.57 to +∞] | 1.21 [-1.44 to +∞] |
| 6-month follow-up | 7.10 [5.29 to +∞] | 9.86 [7.35 to +∞] | **2.76 [0.26 to +∞]** |
| Symptom distress (mCPQ) |  |  |  |
| End of therapy | na | na | na |
| 6-month follow-up | na | na | na |
| Depression (BDI) |  |  |  |
| End of therapy | 9.38 [7.85 to +∞] | 10.86 [8.67 to +∞] | 1.48 [-0.71 to +∞] |
| 6-month follow-up | 7.98 [6.14 to +∞] | 8.93 [6.38 to +∞] | 0.95 [-1.60 to +∞] |
| General psychopathology (SCL-90-R GSI) |  |  |  |
| End of therapy | 0.36 [0.29 to +∞] | 0.47 [0.37 to +∞] | **0.11 [0.01 to +∞]** |
| 6-month follow-up | 0.36 [0.29 to +∞] | 0.47 [0.30 to +∞] | 0.05 [-0.06 to +∞] |
| Number of GP visits (past 12 months) |  |  |  |
| End of therapy | --- | --- | --- |
| 6-month follow-up | -4.77 [-8.02 to +∞] | -3.04 [-7.85 to +∞] | 1.74 [-3.06 to +∞] |
| Emotion regulation skills (ERSQ total score) |  |  |  |
| End of therapy | 0.48 [0.36 to +∞] | 0.72 [0.52 to +∞] | **0.24 [0.04 to +∞]** |
| 6-month follow-up | 0.50 [0.37 to +∞] | 0.72 [0.51 to +∞] | **0.21 [0.01 to +∞]** |
| Awareness (ERSQ) |  |  |  |
| End of therapy | 0.20 [0.03 to +∞] | 0.31 [0.06 to +∞] | 0.11 [-0.14 to +∞] |
| 6-month follow-up | 0.13 [-0.05 to +∞] | 0.20 [-0.08 to +∞] | 0.07 [-0.20 to +∞] |
| Sensations (ERSQ) |  |  |  |
| End of therapy | 0.62 [0.33 to +∞] | 0.73 [0.45 to +∞] | 0.11 [-0.16 to +∞] |
| 6-month follow-up | 0.66 [0.48 to +∞] | 0.68 [0.42 to +∞] | 0.02 [-0.24 to +∞] |
| Clarity (ERSQ) |  |  |  |
| End of therapy | 0.22 [0.06 to +∞] | 0.45 [0.18 to +∞] | 0.23 [-0.04 to +∞] |
| 6-month follow-up | 0.34 [0.14 to +∞] | 0.57 [0.28 to +∞] | 0.23 [-0.06 to +∞] |
| Understanding (ERSQ) |  |  |  |
| End of therapy | 0.46 [0.29 to +∞] | 0.76 [0.50 to +∞] | **0.30 [0.04 to +∞]** |
| 6-month follow-up | 0.66 [0.47 to +∞] | 0.89 [0.61 to +∞] | 0.23 [-0.04 to +∞] |
| Acceptance (ERSQ) |  |  |  |
| End of therapy | 0.57 [0.39 to +∞] | 0.88 [0.61 to +∞] | **0.31 [0.04 to +∞]** |
| 6-month follow-up | 0.61 [0.43 to +∞] | 0.89 [0.62 to +∞] | **0.28 [0.01 to +∞]** |
| Resilience (ERSQ) |  |  |  |
| End of therapy | 0.62 [0.44 to +∞] | 1.02 [0.74 to +∞] | **0.40 [0.12 to +∞]** |
| 6-month follow-up | 0.75 [0.56 to +∞] | 1.02 [0.73 to +∞] | 0.27 [-0.02 to +∞] |
| Readiness to confront (ERSQ) |  |  |  |
| End of therapy | 0.40 [0.26 to +∞] | 0.53 [0.28 to +∞] | 0.12 [-0.12 to +∞] |
| 6-month follow-up | 0.36 [0.19 to +∞] | 0.53 [0.28 to +∞] | 0.17 [-0.09 to +∞] |
| Compassionate self-support (ERSQ) |  |  |  |
| End of therapy | 0.47 [0.27 to +∞] | 0.80 [0.52 to +∞] | **0.33 [0.05 to +∞]** |
| 6-month follow-up | 0.38 [0.20 to +∞] | 0.77 [0.50 to +∞] | **0.39 [0.12 to +∞]** |
| Modification (ERSQ) |  |  |  |
| End of therapy | 0.79 [0.63 to +∞] | 1.01 [0.77 to +∞] | 0.23 [-0.02 to +∞] |
| 6-month follow-up | 0.65 [0.47 to +∞] | 0.91 [0.67 to +∞] | **0.27 [0.02 to +∞]** |

aclinician-rated outcomes

bPositive values indicate a result in favour for ENCERT.

c one-tailed confidence intervals

Figures in bold indicate statistically significant CLI (based on one-tailed p-value).

CLI=cross-level interaction, na=not available.

MUS=medically unexplained symptoms, DSM-IV=Diagnostic and Statistical Manual of Mental Disorders, 4th revision, SOMS-7T= Screening of Somatoform Disorders-7T, MUS interview=Clinician-rated interview for patients with medically unexplained symptoms, SSD=Somatic Symptom Disorder, PHQ-15=Patient Health Questionnaire-15, mPDI= modified Pain Disability Index, EQ-5D=EuroQuol-5D, mSHAI= modified version of the Short Health Anxiety Inventory, mCPQ= modified Coping Pain Questionnaire, BDI=Beck Depression Inventory, GSI=Global Severity Index, SCL-90-R=Symptom Checklist-90-Revised, GP=general practitioner, ERSQ= Emotion Regulation Skills Questionnaire.

Online supplementary material 5

Results of sensitivity analysis 3: Estimated group difference for primary and secondary outcomes at the end of therapy and 6 months after the end of therapy (study therapy completer: patients who regularly completed the therapy; ntotal=178, nSOMA-CBT=87, nENCERT=91)

|  | SOMA-CBT | ENCERT | ENCERT versus SOMA-CBT |
| --- | --- | --- | --- |
|  | Estimated change  [95% confidence interval]c | Estimated change  [95% confidence interval]c | CLIb  [95% confidence interval]c |
| Symptom severity (SOMS-7T) |  |  |  |
| End of therapy | 0.31 [0.23 to +∞] | 0.40 [0.28 to +∞] | 0.08 [-0.03 to +∞] |
| 6-month follow-up | 0.34 [0.27 to +∞] | 0.34 [0.23 to +∞] | -0.00 [-0.11 to +∞] |
| Number of symptoms (MUS interview)a |  |  |  |
| End of therapy | 5.62 [4.36 to +∞] | 5.10 [3.34 to +∞] | -0.52 [-2.28 to +∞] |
| 6-month follow-up | 6.18 [4.85 to +∞] | 5.28 [3.40 to +∞] | -0.90 [-2.77 to +∞] |
| Symptom disability (MUS interview)a |  |  |  |
| End of therapy | na | na | na |
| 6-month follow-up | na | na | na |
| Psychological SSD criteria (MUS interview)a |  |  |  |
| End of therapy | 5.02 [4.10 to +∞] | 6.17 [4.93 to +∞] | 1.15 [-0.09 to +∞] |
| 6-month follow-up | 5.79 [4.90 to +∞] | 6.31 [5.10 to +∞| | 0.51 [-0.68 to +∞] |
| Symptom disability (mPDI) |  |  |  |
| End of therapy | 13.01 [10.06 to +∞] | 14.22 [10.53 to +∞] | 1.22 [-2.46 to +∞] |
| 6-month follow-up | 14.12 [11.41 to +∞] | 14.59 [10.93 to +∞] | 0.47 [-3.18 to +∞] |
| Symptom severity (PHQ-15) |  |  |  |
| End of therapy | 5.24 [4.39 to +∞] | 6.02 [4.84 to +∞] | 0.78 [-0.40 to +∞] |
| 6-month follow-up | 5.27 [4.44 to +∞] | 5.53 [4.31 to +∞] | 0.27 [-0.96 to +∞] |
| Health-related quality of life (EQ-5D) |  |  |  |
| End of therapy | 1.35 [1.04 to +∞] | 1.31 [0.91 to +∞] | -0.04 [-0.44 to +∞] |
| 6-month follow-up | 1.30 [0.98 to +∞] | 1.16 [0.71 to +∞] | -0.13 [-0.59 to +∞] |
| Health anxiety (mSHAI) |  |  |  |
| End of therapy | 10.48 [8.26 to +∞] | 11.85 [8.89 to +∞] | 1.37 [-1.59 to +∞] |
| 6-month follow-up | 10.30 [7.41 to +∞] | 11.94 [8.48 to +∞] | 1.64 [-1.81 to +∞] |
| Cognitive symptom coping (mCPQ) |  |  |  |
| End of therapy | 12.30 [9.98 to +∞] | 14.16 [10.76 to +∞] | 1.86 [-1.53 to +∞] |
| 6-month follow-up | 12.08 [9.77 to +∞] | 15.42 [12.13 to +∞] | **3.34 [0.06 to** +∞**]** |
| Behavioural symptom coping (mCPQ) |  |  |  |
| End of therapy | 9.27 [7.38 to +∞] | 9.53 [6.97 to +∞] | 0.26 [-2.29 to +∞] |
| 6-month follow-up | 6.82 [4.83 to +∞] | 9.58 [6.92 to +∞] | **2.76 [0.11 to +∞]** |
| Symptom distress (mCPQ) |  |  |  |
| End of therapy | 16.39 [13.31 to +∞] | 20.01 [16.10 to +∞] | 3.62 [-0.28 to +∞] |
| 6-month follow-up | 17.39 [14.18 to +∞] | 18.48 [14.30 to +∞] | 1.09 [-3.08 to +∞] |
| Depression (BDI) |  |  |  |
| End of therapy | 9.20 [7.57 to +∞] | 10.86 [8.63 to +∞] | 1.66 [-0.56 to +∞] |
| 6-month follow-up | 8.34 [6.39 to +∞] | 9.18 [6.59 to +∞] | 0.84 [-1.75 to +∞] |
| General psychopathology (SCL-90-R GSI) |  |  |  |
| End of therapy | 0.36 [0.28 to +∞] | 0.47 [0.37 to +∞] | **0.11 [0.01 to +∞]** |
| 6-month follow-up | 0.38 [0.30 to +∞] | 0.43 [0.31 to +∞] | 0.05 [-0.07 to +∞] |
| Number of GP visits (past 12 months) |  |  |  |
| End of therapy | --- | --- | --- |
| 6-month follow-up | na | na | na |
| Emotion regulation skills (ERSQ total score) |  |  |  |
| End of therapy | 0.48 [0.34 to +∞] | 0.66 [0.46 to +∞] | 0.18 [-0.01 to +∞] |
| 6-month follow-up | 0.52 [0.36 to +∞] | 0.73 [0.52 to +∞] | **0.22 [0.01 to +∞]** |
| Awareness (ERSQ) |  |  |  |
| End of therapy | 0.16 [-0.02 to +∞] | 0.30 [0.05 to +∞] | 0.14 [-0.11 to +∞] |
| 6-month follow-up | 0.14 [-0.05 to +∞] | 0.24 [-0.03 to +∞] | 0.10 [-0.17 to +∞] |
| Sensations (ERSQ) |  |  |  |
| End of therapy | 0.58 [0.38 to +∞] | 0.62 [0.34 to +∞] | 0.03 [-0.24 to +∞] |
| 6-month follow-up | 0.68 [0.49 to +∞] | 0.65 [0.37 to +∞] | -0.03 [-0.31 to +∞] |
| Clarity (ERSQ) |  |  |  |
| End of therapy | 0.25 [0.06 to +∞] | 0.42 [0.14 to +∞] | 0.17 [-0.11 to +∞] |
| 6-month follow-up | 0.36 [0.13 to +∞] | 0.59 [0.28 to +∞] | 0.24 [-0.07 to +∞] |
| Understanding (ERSQ) |  |  |  |
| End of therapy | 0.46 [0.29 to +∞] | 0.73 [0.48 to +∞] | **0.27 [0.02 to +∞]** |
| 6-month follow-up | 0.67 [0.47 to +∞] | 0.95 [0.66 to +∞] | 0.28 [-0.003 to +∞] |
| Acceptance (ERSQ) |  |  |  |
| End of therapy | 0.51 [0.32 to +∞] | 0.88 [0.61 to +∞] | **0.37 [0.10 to +∞]** |
| 6-month follow-up | 0.59 [0.40 to +∞] | 0.96 [0.68 to +∞] | **0.37 [0.09 to +∞]** |
| Resilience (ERSQ) |  |  |  |
| End of therapy | 0.62 [0.43 to +∞] | 0.94 [0.67 to +∞] | **0.32 [0.04 to +∞]** |
| 6-month follow-up | 0.78 [0.57 to +∞] | 1.03 [0.73 to +∞] | 0.25 [-0.05 to +∞] |
| Readiness to confront (ERSQ) |  |  |  |
| End of therapy | 0.41 [0.23 to +∞] | 0.46 [0.21 to +∞] | 0.05 [-0.20 to +∞] |
| 6-month follow-up | 0.33 [0.15 to +∞] | 0.55 [0.30 to +∞] | 0.22 [-0.03 to +∞] |
| Compassionate self-support (ERSQ) |  |  |  |
| End of therapy | 0.53 [0.33 to +∞] | 0.66 [0.37 to +∞] | 0.12 [-0.16 to +∞] |
| 6-month follow-up | 0.50 [0.30 to +∞] | 0.76 [0.48 to +∞] | 0.27 [-0.02 to +∞] |
| Modification (ERSQ) |  |  |  |
| End of therapy | 0.79 [0.62 to +∞] | 0.92 [0.69 to +∞] | 0.14 [-0.10 to +∞] |
| 6-month follow-up | 0.64 [0.44 to +∞] | 0.87 [0.61 to +∞] | 0.24 [-0.02 to +∞] |

aclinician-rated outcomes

bPositive values indicate a result in favour for ENCERT.

cone-tailed confidence intervals

Figures in bold indicate statistically significant CLI (based on one-tailed p-value).

CLI=cross-level interaction, na=not available.

MUS=medically unexplained symptoms, DSM-IV=Diagnostic and Statistical Manual of Mental Disorders, 4th revision, SOMS-7T= Screening of Somatoform Disorders-7T, MUS interview=Clinician-rated interview for patients with medically unexplained symptoms, SSD=Somatic Symptom Disorder, PHQ-15=Patient Health Questionnaire-15, mPDI= modified Pain Disability Index, EQ-5D=EuroQuol-5D, mSHAI= modified version of the Short Health Anxiety Inventory, mCPQ= modified Coping Pain Questionnaire, BDI=Beck Depression Inventory, GSI=Global Severity Index, SCL-90-R=Symptom Checklist-90-Revised, GP=general practitioner, ERSQ= Emotion Regulation Skills Questionnaire.

Online supplementary material 6

Results of sensitivity analysis 4: Estimated group difference for primary and secondary outcomes at the end of therapy and 6 months after the end of therapy (patient per protocol sample: patients who regularly completed therapy and primary outcome completed at baseline, end of therapy, and 6-month follow-up ntotal=142, nSOMA-CBT=69, nENCERT=73)

|  | SOMA-CBT | ENCERT | ENCERT versus SOMA-CBT |
| --- | --- | --- | --- |
|  | Estimated change  [95% confidence interval]c | Estimated change  [95% confidence interval]c | CLIb  [95% confidence interval]c |
| Symptom severity (SOMS-7T) |  |  |  |
| End of therapy | na | na | na |
| 6-month follow-up | na | na | na |
| Number of symptoms (MUS interview)a |  |  |  |
| End of therapy | 5.82 [4.46 to +∞] | 4.90 [3.00 to +∞] | -0.91 [-2.81 to +∞] |
| 6-month follow-up | 6.10 [4.66 to +∞] | 5.23 [3.21 to +∞] | -0.87 [-2.89 to +∞] |
| Symptom disability (MUS interview)a |  |  |  |
| End of therapy | na | na | na |
| 6-month follow-up | na | na | na |
| Psychological SSD criteria (MUS interview)a |  |  |  |
| End of therapy | 5.26 [4.27 to +∞] | 6.45 [5.09 to +∞] | 1.19 [-0.16 to +∞] |
| 6-month follow-up | 5.95 [4.99 to +∞] | 6.56 [5.25 to +∞] | 0.61 [-0.69 to +∞] |
| Symptom disability (mPDI) |  |  |  |
| End of therapy | 13.45 [10.47 to +∞] | 14.17 [10.33 to +∞] | 0.72 [-3.11 to +∞] |
| 6-month follow-up | 14.43 [11.62 to +∞] | 14.38 [10.59 to +∞] | -0.05 [-3.83 to +∞] |
| Symptom severity (PHQ-15) |  |  |  |
| End of therapy | 5.40 [4.55 to +∞] | 5.97 [4.74 to +∞] | 0.57 [-0.66 to +∞] |
| 6-month follow-up | 5.37 [4.55 to +∞] | 5.41 [4.15 to +∞] | 0.04 [-1.22 to +∞] |
| Health-related quality of life (EQ-5D) |  |  |  |
| End of therapy | 1.39 [1.07 to +∞] | 1.35 [0.92 to +∞] | -0.05 [-0.47 to +∞] |
| 6-month follow-up | 1.33 [1.01 to +∞] | 1.19 [0.72 to +∞] | -0.14 [-0.60 to +∞] |
| Health anxiety (mSHAI) |  |  |  |
| End of therapy | 11.19 [8.91 to +∞] | 12.41 [9.33 to +∞] | 1.22 [-1.85 to +∞] |
| 6-month follow-up | 10.68 [7.72 to +∞] | 12.43 [8.89 to +∞] | 1.75 [-1.78 to +∞] |
| Cognitive symptom coping (mCPQ) |  |  |  |
| End of therapy | 12.29 [9.87 to +∞] | 15.67 [12.05 to +∞] | 3.38 [-0.23 to +∞] |
| 6-month follow-up | 11.77 [9.45 to +∞] | 15.92 [12.50 to +∞] | **4.15 [0.75 to +∞]** |
| Behavioural symptom coping (mCPQ) |  |  |  |
| End of therapy | na | na | na |
| 6-month follow-up | na | na | na |
| Symptom distress (mCPQ) |  |  |  |
| End of therapy | na | na | na |
| 6-month follow-up | na | na | na |
| Depression (BDI) |  |  |  |
| End of therapy | 9.33 [7.73 to +∞] | 11.11 [8.81 to +∞] | 1.79 [-0.51 to +∞] |
| 6-month follow-up | 8.51 [6.57 to +∞] | 9.36 [6.72 to +∞] | 0.85 [-1.78 to +∞] |
| General psychopathology (SCL-90-R GSI) |  |  |  |
| End of therapy | 0.37 [0.29 to +∞] | 0.49 [0.38 to +∞] | **0.12 [0.01 to +∞]** |
| 6-month follow-up | 0.39 [0.31 to +∞] | 0.44 [0.32 to +∞] | 0.05 [-0.08 to +∞] |
| Number of GP visits (past 12 months) |  |  |  |
| End of therapy | --- | --- | --- |
| 6-month follow-up | -4.46 [-7.84 to -+∞] | -3.79 [-8.77 to +∞] | 0.67 [-4.29 to +∞] |
| Emotion regulation skills (ERSQ total score) |  |  |  |
| End of therapy | 0.51 [0.36 to +∞] | 0.71 [0.51 to +∞] | **0.21 [0.002 to +∞]** |
| 6-month follow-up | 0.52 [0.37 to +∞] | 0.75 [0.54 to +∞] | **0.23 [0.02 to +∞]** |
| Awareness (ERSQ) |  |  |  |
| End of therapy | 0.19 [0.01 to +∞] | 0.32 [0.06 to +∞] | 0.14 [-0.13 to +∞] |
| 6-month follow-up | 0.13 [-0.06 to +∞] | 0.26 [-0.01 to +∞] | 0.13 [-0.14 to +∞] |
| Sensations (ERSQ) |  |  |  |
| End of therapy | 0.59 [0.39 to +∞] | 0.68 [0.38 to +∞] | 0.08 [-0.21 to +∞] |
| 6-month follow-up | 0.69 [0.49 to +∞] | 0.65 [0.37 to +∞] | -0.03 [-0.32 to +∞] |
| Clarity (ERSQ) |  |  |  |
| End of therapy | 0.30 [0.11 to +∞] | 0.47 [0.18 to +∞] | 0.17 [-0.13 to +∞] |
| 6-month follow-up | 0.37 [0.14 to +∞] | 0.63 [0.31 to +∞] | 0.26 [-0.06 to +∞] |
| Understanding (ERSQ) |  |  |  |
| End of therapy | 0.49 [0.31 to +∞] | 0.75 [0.49 to +∞] | 0.26 [-0.002 to +∞] |
| 6-month follow-up | 0.68 [0.47 to +∞] | 0.97 [0.68 to +∞] | **0.29 [0.001 to +∞]** |
| Acceptance (ERSQ) |  |  |  |
| End of therapy | 0.55 [0.34 to +∞] | 0.92 [0.62 to +∞] | **0.37 [0.08 to +∞]** |
| 6-month follow-up | 0.61 [0.41 to +∞] | 0.97 [0.68 to +∞] | **0.35 [0.07 to +∞]** |
| Resilience (ERSQ) |  |  |  |
| End of therapy | 0.65 [0.44 to +∞] | 1.00 [0.71 to +∞] | **0.35 [0.06 to** +∞**]** |
| 6-month follow-up | 0.79 [0.58 to +∞] | 1.05 [0.74 to +∞] | 0.26 [-0.05 to +∞] |
| Readiness to confront (ERSQ) |  |  |  |
| End of therapy | 0.45 [0.27 to +∞] | 0.55 [0.28 to +∞] | 0.10 [-0.17 to +∞] |
| 6-month follow-up | 0.35 [0.16 to +∞] | 0.59 [0.32 to +∞] | 0.24 [-0.03 to +∞] |
| Compassionate self-support (ERSQ) |  |  |  |
| End of therapy | 0.54 [0.32 to +∞] | 0.78 [0.48 to +∞] | 0.24 [-0.06 to +∞] |
| 6-month follow-up | 0.48 [0.27 to +∞] | 0.81 [0.51 to +∞] | **0.33 [0.04 to +∞]** |
| Modification (ERSQ) |  |  |  |
| End of therapy | 0.80 [0.63 to +∞] | 0.99 [0.74 to +∞] | 0.20 [-0.06 to +∞] |
| 6-month follow-up | 0.64 [0.44 to +∞] | 0.90 [0.63 to +∞] | 0.26 [-0.01 to +∞] |

aclinician-rated outcomes

bPositive values indicate a result in favour for ENCERT.

cone-tailed confidence intervals

Figures in bold indicate statistically significant CLI (based on one-tailed p-value).

CLI=cross-level interaction to na=not available.

MUS=medically unexplained symptoms to DSM-IV=Diagnostic and Statistical Manual of Mental Disorders to 4th revision to SOMS-7T= Screening of Somatoform Disorders-7T to MUS interview=Clinician-rated interview for patients with medically unexplained symptoms to SSD=Somatic Symptom Disorder to PHQ-15=Patient Health Questionnaire-15 to mPDI= modified Pain Disability Index to EQ-5D=EuroQuol-5D to mSHAI= modified version of the Short Health Anxiety Inventory to mCPQ= modified Coping Pain Questionnaire to BDI=Beck Depression Inventory to GSI=Global Severity Index to SCL-90-R=Symptom Checklist-90-Revised to GP=general practitioner to ERSQ= Emotion Regulation Skills Questionnaire.
